# Supplementary material
Source: publisher figshare collection journal article supplement (https://tandf.figshare.com/articles/dataset/_/1138532)
Supplement: Supplementary file 1 [file 3]

## Online supplementary material

**Article Title: Robustness of Tests for Directional Mean**

**Journal Name: Statistics**

**Author's Name: Arnab Kumar Laha and Mahesh K.C**

**Address (corresponding author): Wing 15G, Indian Institute of Management  
Ahmedabad, Vastrapur, Ahmedabad-380015, Gujarat, India, Tel. +91 79 6632 4947,  
Fax: +91 79 6632 6896**

**Email (corresponding author): [arnab@iimahd.ernet.in](mailto:arnab@iimahd.ernet.in)**

### 1. Some Definitions

Here we will give a brief description of some popular circular and spherical probability distributions. We also included the definition of circular trimmed mean.

#### 1.1 Circular and Spherical Distributions

The most popular symmetric unimodal distribution used for modeling circular data is the circular normal distribution (a.k.a. von-Mises distribution) which has the probability density function (p.d.f)

$$f(\theta; \mu, \kappa) = \frac{1}{2\pi I_0(\kappa)} e^{\kappa \cos(\theta - \mu)}, 0 \leq \theta < 2\pi, 0 \leq \mu < 2\pi, \kappa > 0$$

where  $I_0(\kappa)$  is the modified Bessel function of order zero, the parameters  $\mu$  and  $\kappa$  are respectively called the mean direction and the concentration parameter. We will denote this distribution as  $CN(\mu, \kappa)$ . Besides circular normal distribution, another popular symmetric unimodal distribution used for modeling circular data is the wrapped normal distribution obtained by wrapping  $N(\mu, \sigma^2)$  on to the circle and having the p.d.f.

$$f(\theta; \mu, \rho) = \frac{1}{2\pi} \left\{ 1 + 2 \sum_{p=1}^{\infty} (\rho)^{p^2} \cos p(\theta - \mu) \right\}, 0 \leq \theta < 2\pi, 0 \leq \mu < 2\pi, 0 < \rho < 1.$$

The parameters  $\mu$  and  $\rho$  are respectively called the mean direction and the concentration parameter. We will denote this distribution as  $WN(\mu, \rho)$ .

One of the most popular symmetric distributions used for modeling spherical data is the von-Mises-Fisher distribution. The random vector  $\tilde{\mathbf{X}}$  is said to follow the von-Mises-Fisher distribution  $M(\tilde{\boldsymbol{\mu}}, \kappa)$  if it has the following p.d.f

$$f((\theta, \phi); (\alpha, \beta), \kappa) = \frac{\kappa \sin \theta}{4\pi \sinh \kappa} \exp(\cos \theta \cos \alpha + \sin \theta \sin(\phi - \beta)) \text{ where}$$

$\tilde{\mathbf{X}} = (\sin \Theta \cos \Phi, \sin \Theta \sin \Phi, \cos \Theta)^T$ ,  $\tilde{\boldsymbol{\mu}} = (\sin \alpha \cos \beta, \sin \alpha \sin \beta, \cos \alpha)^T$ ,  $0 \leq \theta, \alpha \leq \pi$ ,  $0 \leq \phi, \beta \leq 2\pi$  and  $\kappa > 0$ . The parameters  $\tilde{\boldsymbol{\mu}}$  and  $\kappa$  are called ‘mean direction’ and ‘concentration parameter’ respectively.

## 1.2 The circular trimmed mean

Suppose  $\Theta$  is a circular random variable with p.d.f  $f(\theta)$  and  $0 < \gamma \leq 0.5$  is fixed. Let  $\alpha, \beta$  be two points on the unit circle satisfying

$$(i) \int_{\beta}^{\alpha} f(\theta) d\theta = 1-2\gamma \text{ and}$$

$$(ii) d_1(\alpha, \beta) \leq d_1(\mu, \nu) \text{ for all } \mu, \nu \text{ satisfying } \int_{\nu}^{\mu} f(\theta) d\theta = 1-2\gamma \text{ where } d_1(\phi, \xi) \text{ is the length of}$$

the arc starting from  $\xi$  and ending at  $\phi$  traversed in the anticlockwise direction. Then

the  $\gamma$ -circular trimmed mean ( $\gamma$ -CTM) is defined as  $\mu_{\gamma} = \arg \left[ \frac{1}{(1-2\gamma)} \int_{\beta}^{\alpha} e^{i\theta} f(\theta) d\theta \right]$  where

$\gamma$  is the trimming proportion.

## 2. Proofs of theorems and lemmas

**Proof of Theorem 2.1:** Let  $F_\mu$  denote the  $CN(\mu, \kappa)$  distribution and  $\delta_x$  denote the point mass at  $x$ . Also let  $G_\varepsilon = (1-\varepsilon)F_0 + \varepsilon\delta_x$ . We note that,  $E_{(1-\varepsilon)F_0 + \varepsilon\delta_x}(\cos \Theta) = y$  and  $E_{(1-\varepsilon)F_0 + \varepsilon\delta_x}(\sin \Theta) = \varepsilon \sin x$ . Using these we get

$$W(G_\varepsilon) = \sqrt{y^2 + \varepsilon^2 \sin^2 x} - y. \quad \dots (2.1)$$

Again, an easy computation yields  $W(F_\mu) = c$ . ... (2.2)

Now using (2.1) and (2.2) we have

$$\varepsilon_\mu^{**}(W) = \inf \left\{ \varepsilon > 0 : \sqrt{y^2 + \varepsilon^2 \sin^2 x} = y + c \text{ for some } 0 \leq x < 2\pi \right\}.$$

Hence the theorem is established.

**Proof of Theorem 2.2:** Let  $F_\mu$  and  $\delta_x$  be as in the proof of theorem 2.1. Also let  $G_\varepsilon = (1-\varepsilon)F_\mu + \varepsilon\delta_x$ . It is easy to check from the definition of  $W(F)$  that

$$W(G_\varepsilon) = \sqrt{\rho^2(1-\varepsilon)^2 + 2\rho\varepsilon(1-\varepsilon)\cos(x-\mu) + \varepsilon^2} - (\rho(1-\varepsilon)\cos\mu + \varepsilon\cos x)$$

and  $W(F_0) = 0$ . Then straightforward calculations yield the PBF of  $W$  as

$$\varepsilon_\mu^*(W) = \inf \left\{ \varepsilon > 0 : \varepsilon \sin x + \rho(1-\varepsilon)\sin\mu = 0 \text{ for some } x, 0 \leq x < 2\pi \right\}.$$

Since  $\varepsilon \sin x + \rho(1-\varepsilon)\sin\mu = 0$  has a solution in  $x \in [0, 2\pi)$  if and only if  $\frac{\rho|\sin\mu|}{1+\rho|\sin\mu|} < \varepsilon$ , we

have,  $\varepsilon_\mu^*(W) = \frac{\rho|\sin\mu|}{1+\rho|\sin\mu|}$ . Further, the PBP is  $\varepsilon^* = \sup_\mu (\varepsilon_\mu^*(W)) = \frac{\rho}{1+\rho}$ .

Hence the theorem is established.

**Proof of Theorem 3.1:** Let  $F_\mu$ ,  $G_\varepsilon$  and  $\delta_x$  be as in the proof of theorem 2.1. It is straightforward to check that  $W_1(G_\varepsilon) = \arctan^* \left( \frac{\varepsilon \sin x}{\rho(1-\varepsilon) + \varepsilon \cos x} \right)$  and  $W_1(F_\mu) = \mu$ . Since  $\arctan^* \left( \frac{\varepsilon \sin x}{\rho(1-\varepsilon) + \varepsilon \cos x} \right) = \mu$  has a solution in  $x \in [0, 2\pi)$  if and only if  $\frac{\rho|\sin \mu|}{1 + \rho|\sin \mu|} < \varepsilon$ , we have the LBF of  $W_1$  as  $\varepsilon_\mu^{**}(W_1) = \frac{\rho|\sin \mu|}{1 + \rho|\sin \mu|}$ . The LBP of  $W_1$  can be easily computed to be  $\varepsilon^{**} = \sup_\mu (\varepsilon_\mu^{**}(W_1)) = \frac{\rho}{1 + \rho}$ .

Hence the theorem is established.

**Proof of Theorem 3.2:** Let  $F_\mu$  and  $\delta_x$  be as in the proof of theorem 2.1. Let  $G_\varepsilon$  be as in the proof of theorem 2.2. Note that it is straightforward to check that

$$W_1(G_\varepsilon) = \arctan^* \left( \frac{\rho(1-\varepsilon)\sin \mu + \varepsilon \sin x}{\rho(1-\varepsilon)\cos \mu + \varepsilon \cos x} \right) \text{ and } W_1(F_0) = 0.$$

Since  $\arctan^* \left( \frac{\rho(1-\varepsilon)\sin \mu + \varepsilon \sin x}{\rho(1-\varepsilon)\cos \mu + \varepsilon \cos x} \right) = 0$  has a solution in  $x \in [0, 2\pi)$  if and only if  $\frac{\rho|\sin \mu|}{1 + \rho|\sin \mu|} < \varepsilon$ , we have the PBF of  $W_1$  as  $\varepsilon_\mu^*(W_1) = \frac{\rho|\sin \mu|}{1 + \rho|\sin \mu|}$ . Further, the PBP is

$$\varepsilon^* = \sup_\mu (\varepsilon_\mu^*(W_1)) = \frac{\rho}{1 + \rho}.$$

Hence the theorem is established.

**Proof of Theorem 4.1: a)** Let  $F_\mu$  and  $\delta_x$  be as in the proof of theorem 2.1. Let  $G_\varepsilon = (1-\varepsilon)F_0 + \varepsilon\delta_x$ ,  $x \in [-\pi, \pi)$  and  $0 \leq \gamma < 0.5$ . Then we can write

$$G_{\varepsilon}(\theta) = \begin{cases} (1-\varepsilon)F_0(\theta) & \text{if } -\pi \leq \theta < x \\ (1-\varepsilon)F_0(\theta) + \varepsilon & \text{if } \theta \leq x < \pi \end{cases}$$

where  $F_0(\theta) = \frac{1}{2\pi I_0(\kappa)} \int_{-\pi}^{\theta} e^{\kappa \cos \varphi} d\varphi$ . Suppose  $\theta_1 = F_0^{-1}\left(\frac{\gamma}{1-\varepsilon}\right)$ ,  $\theta_2 = F_0^{-1}\left(1 - \frac{\gamma}{1-\varepsilon}\right)$  and also note that since  $F_0$  is symmetric about zero we have  $\theta_1 = -\theta_2$ .

**Case 1: When  $\theta_1 < x < \theta_2$**

In this case we have,  $E_{\gamma, (1-\varepsilon)F_0 + \varepsilon \delta_x}(\sin \Theta) = \frac{(1-\varepsilon)}{(1-2\gamma)} \int_{\theta_1}^{\theta_2} \sin \theta dF_0 + \frac{\varepsilon}{1-2\gamma} \sin x$  and

$E_{\gamma, (1-\varepsilon)F_0 + \varepsilon \delta_x}(\cos \Theta) = \frac{(1-\varepsilon)}{(1-2\gamma)} \int_{\theta_1}^{\theta_2} \cos \theta dF_0 + \frac{\varepsilon}{1-2\gamma} \cos x$ . Using the above and after some

simplifications we get

$$W_{\gamma}(G_{\varepsilon}) = \arctan^* \left[ \frac{\vartheta_{\gamma,0}(1-\varepsilon) \tan \mu_{\gamma,0} + \varepsilon \sin x}{\vartheta_{\gamma,0}(1-\varepsilon) + \varepsilon \cos x} \right].$$

Let  $\varepsilon < \min(\gamma, 1-\gamma)$ ,  $\lambda = F_0^{-1}\left(\frac{\gamma-\varepsilon}{1-\varepsilon}\right)$ , and  $\psi = F_0^{-1}\left(\frac{1-\gamma}{1-\varepsilon}\right)$ . We define the following,

$$\tilde{E}_{\gamma, F_0}(\sin \Theta) = \frac{1}{1-2\gamma} \int_{\lambda}^{\theta_2} \sin \theta dF_0 \text{ and } \check{E}_{\gamma, F_0}(\sin \Theta) = \frac{1}{1-2\gamma} \int_{\theta_1}^{\psi} \sin \theta dF_0.$$

**Case 2: When  $x \leq \theta_1$**

In this case we have,  $E_{\gamma, (1-\varepsilon)F_0 + \varepsilon \delta_x}(\sin \Theta) = (1-\varepsilon)\tilde{E}_{\gamma, F_0}(\sin \Theta) = \frac{1-\varepsilon}{1-2\gamma} \int_{\lambda}^{\theta_2} \sin \theta dF_0$  and

$E_{\gamma, (1-\varepsilon)F_0 + \varepsilon \delta_x}(\cos \Theta) = (1-\varepsilon)\tilde{E}_{\gamma, F_0}(\cos \Theta) = \frac{1-\varepsilon}{1-2\gamma} \int_{\lambda}^{\theta_2} \cos \theta dF_0$ . Therefore, we get

$$W_{\gamma}(G_{\varepsilon}) = \arctan^* \left[ \frac{\tilde{E}_{\gamma, F_0}(\sin \Theta)}{\tilde{E}_{\gamma, F_0}(\cos \Theta)} \right].$$

**Case 3: When  $x \geq \theta_2$**

In this case we have,  $E_{\gamma, (1-\varepsilon)F_0 + \varepsilon \delta_x}(\sin \Theta) = (1-\varepsilon)\tilde{E}_{\gamma, F_0}(\sin \Theta) = \frac{1-\varepsilon}{1-2\gamma} \int_{\theta_1}^{\Psi} \sin \theta dF_0$  and

$E_{\gamma, (1-\varepsilon)F_0 + \varepsilon \delta_x}(\cos \Theta) = (1-\varepsilon)\tilde{E}_{\gamma, F_0}(\cos \Theta) = \frac{1-\varepsilon}{1-2\gamma} \int_{\theta_1}^{\Psi} \cos \theta dF_0$ . Therefore, we get

$$W_{\gamma}(G_{\varepsilon}) = \arctan^* \left[ \frac{\tilde{E}_{\gamma, F_0}(\sin \Theta)}{\tilde{E}_{\gamma, F_0}(\cos \Theta)} \right].$$

Combining the above three cases we have

$$W_{\gamma}(G_{\varepsilon}) = \begin{cases} \arctan^* \left[ \frac{\vartheta_{\gamma, 0}(1-\varepsilon) \tan \mu_{\gamma, 0} + \varepsilon \sin x}{\vartheta_{\gamma, 0}(1-\varepsilon) + \varepsilon \cos x} \right], & \theta_1 < x < \theta_2 \\ \arctan^* \left[ \frac{\tilde{E}_{\gamma, F_0}(\sin \Theta)}{\tilde{E}_{\gamma, F_0}(\cos \Theta)} \right], & x \leq \theta_1 \\ \arctan^* \left[ \frac{\tilde{E}_{\gamma, F_0}(\sin \Theta)}{\tilde{E}_{\gamma, F_0}(\cos \Theta)} \right], & x \geq \theta_2. \end{cases}$$

Using Lemma 1 and Lemma 2 we get

$$\begin{aligned} \varepsilon_{\mu, \gamma}^{**}(W_{\gamma}) &= \inf \left\{ \varepsilon > 0 : W_{\gamma}(G_{\varepsilon}) = \mu \text{ for some } x \in [-\pi, \pi) \right\} \\ &= \inf \left\{ \varepsilon > 0 : \frac{\varepsilon \sin x}{\vartheta_{\gamma, 0}(1-\varepsilon) + \varepsilon \cos x} = \tan \mu \text{ for some } x \in (\theta_1, \theta_2) \right\} \quad \dots (4.1) \\ &= \inf \left\{ \varepsilon > 0 : \varepsilon = \frac{\vartheta_{\gamma, 0}(1-\varepsilon) \sin \mu}{\sin(x-\mu) + \vartheta_{\gamma, 0} \sin \mu} \text{ for some } x \in (\theta_1, \theta_2) \right\}. \end{aligned}$$

Since  $\sin(x-\mu) \leq 1$ , we have  $\varepsilon_{\mu, \gamma}^{**}(W_{\gamma}) \geq \frac{\vartheta_{\gamma, 0} |\sin \mu|}{1 + \vartheta_{\gamma, 0} |\sin \mu|}$  for  $0 \leq \mu \leq \pi$ .

**b)** Now, from (4.1) we get  $x = \mu + \sin^{-1}(\Lambda)$  where  $\Lambda = \varepsilon^{-1} \vartheta_{\gamma,0} (1 - \varepsilon) \sin \mu$  has a solution in  $x \in (\theta_1, \theta_2)$  if and only if  $|\Lambda| < 1$ . We define the following quantities:

$k_1(\mu, \varepsilon) = \sup\{\sin(x - \mu) : x \in (\theta_1, \theta_2)\} < 1$  and  $k_2(\mu, \varepsilon) = \inf\{\sin(x - \mu) : x \in (\theta_1, \theta_2)\} > -1$  such that  $k_2(\mu, \varepsilon) < k_1(\mu, \varepsilon)$ . Let  $\tau_1 = k_1(\mu, \varepsilon) + \vartheta_{\gamma,0} |\sin \mu|$  and  $\tau_2 = k_2(\mu, \varepsilon) + \vartheta_{\gamma,0} |\sin \mu|$ .

Then  $x = \mu + \sin^{-1}(\Lambda)$  has a solution in  $x \in (\theta_1, \theta_2)$  if and only if

$$\frac{\vartheta_{\gamma,0} |\sin \mu|}{\tau_1} < \varepsilon < \frac{\vartheta_{\gamma,0} |\sin \mu|}{\tau_2} \text{ when } \tau_1, \tau_2 > 0,$$

$$\frac{\vartheta_{\gamma,0} |\sin \mu|}{\tau_1} < \varepsilon \text{ and } \varepsilon < \frac{-\vartheta_{\gamma,0} |\sin \mu|}{\tau_2} \text{ when } \tau_1 > 0, \tau_2 < 0 \text{ and}$$

$$\frac{\vartheta_{\gamma,0} |\sin \mu|}{\tau_2} < \varepsilon < \frac{\vartheta_{\gamma,0} |\sin \mu|}{\tau_1} \text{ when } \tau_1, \tau_2 < 0.$$

Therefore,  $\varepsilon_{\mu,\gamma}^{**}(W_\gamma) \geq \frac{\vartheta_{\gamma,0} |\sin \mu|}{k_1(\mu) + \vartheta_{\gamma,0} |\sin \mu|}$ .

**c)** Further, the LBP of  $W_\gamma$  satisfies  $\varepsilon^{**} \geq \frac{\vartheta_{\gamma,0}}{1 + \vartheta_{\gamma,0}}$ .

Hence the theorem is established.

**Proof of Theorem 4.2:** Let  $F_\mu$  and  $\delta_x$  be as in the proof of theorem 2.1. Further, for  $0 \leq \gamma < 0.5$  let  $G_\varepsilon = (1 - \varepsilon)F_\mu + \varepsilon\delta_x$ ,  $x \in [\mu - \pi, \mu + \pi)$ . Then

$$G_\varepsilon(\theta) = \begin{cases} (1 - \varepsilon)F_\mu(\theta) & \text{if } \mu - \pi \leq \theta < x \\ (1 - \varepsilon)F_\mu(\theta) + \varepsilon & \text{if } \theta \leq x < \mu + \pi \end{cases}$$

where  $F_\mu(\theta) = \frac{1}{2\pi I_0(\kappa)} \int_{\mu-\pi}^{\theta} e^{\kappa \cos \varphi} d\varphi = F_0(\theta - \mu)$ . Now, when  $c_1(\mu) < x < c_2(\mu)$ , we have

$$W_\gamma(G_\varepsilon) = \arctan^* \left[ \frac{E_{\gamma, G_\varepsilon}(\sin \Theta)}{E_{\gamma, G_\varepsilon}(\cos \Theta)} \right] \text{ and } W_\gamma(F_\mu) = \mu.$$

Note that  $\mu = 0$  under  $H_0$  giving  $W_\gamma(F_0) = 0$  and hence

$$W_\gamma(G_\varepsilon) = 0 \Rightarrow \int_{c_1(\mu)}^{c_2(\mu)} \sin \theta dG_\varepsilon(\theta) = 0 \Rightarrow (1-\varepsilon)S_\gamma + \varepsilon \sin x = 0$$

$$\text{where } S_\gamma = \int_{c_1(\mu)}^{c_2(\mu)} \sin \theta f_\mu(\theta) d\theta = \cos \mu \int_{v_1}^{v_2} \sin v f_0(v) dv + \sin \mu \int_{v_1}^{v_2} \cos v f_0(v) dv, v = \theta - \mu,$$

$v_1 = F_0^{-1}(\gamma)$  and  $v_2 = F_0^{-1}(1-\gamma)$ . Since  $f_0$  is symmetric about zero,  $v_1 = -v_2$ , and  $\sin \theta$  is odd function we have

$$S_\gamma = 2 \sin \mu \int_0^{v_2} \cos v f_0(v) dv = 2 C_\gamma \sin \mu = \lambda_\mu.$$

By Lemma 3 we have  $C_\gamma > 0$ . Therefore, we get

$$\begin{aligned} \varepsilon_{\mu, \gamma}^*(W_\gamma) &= \inf \{ \varepsilon > 0 : W_\gamma(G_\varepsilon) = 0 \text{ for some } x \in (c_1(\mu), c_2(\mu)) \} \\ &= \inf \{ \varepsilon > 0 : (1-\varepsilon)\lambda_\mu + \varepsilon \sin x = 0 \text{ for some } x \in (c_1(\mu), c_2(\mu)) \}. \end{aligned}$$

Now,  $(1-\varepsilon)\lambda_\mu + \varepsilon \sin x = 0 \Rightarrow x = \sin^{-1} \left( \frac{-\lambda_\mu(1-\varepsilon)}{\varepsilon} \right) = \sin^{-1}(\Delta)$  where  $\Delta = \frac{-\lambda_\mu(1-\varepsilon)}{\varepsilon}$ . Then

the equation has a solution in  $x$  if and only if  $\psi_\mu \leq \Delta \leq \phi_\mu$ . This yield:

$$\begin{aligned} \max(0, \min\{\zeta_\mu, 1\}) &\leq \varepsilon \leq \max(0, \min\{\xi_\mu, 1\}) \text{ if } \lambda_\mu - \phi_\mu > 0 \\ \min(1, \max\{\zeta_\mu, \xi_\mu, 0\}) &\leq \varepsilon \text{ if } \lambda_\mu - \phi_\mu < 0 \text{ and } \lambda_\mu - \psi_\mu > 0 \\ \max(0, \min\{\xi_\mu, 1\}) &\leq \varepsilon \leq \max(0, \min\{\zeta_\mu, 1\}) \text{ if } \lambda_\mu - \psi < 0. \end{aligned}$$



Now, when  $x < c_1(\mu)$  and  $x > c_2(\mu)$ , we have  $W_\gamma(G_\varepsilon) = (1-\varepsilon)\lambda_\mu \neq 0$ . Since  $W_\gamma$  does not involve  $x$ , for any  $\varepsilon$ , there exist no solution for which  $x < c_1(\mu)$  and  $x > c_2(\mu)$ .

Noting that  $-2C_\gamma \leq \lambda_\mu \leq 2C_\gamma$ , we have

$$\varepsilon_{\mu,\gamma}^*(W_\gamma) = \begin{cases} \max(0, \min\{\xi_\mu, 1\}) & \text{if } 2C_\gamma \geq \lambda_\mu \geq \phi_\mu \\ \min(1, \max\{\xi_\mu, \xi_\mu, 0\}) & \text{if } \psi_\mu \leq \lambda_\mu \leq \phi_\mu \\ \max(0, \min\{\xi_\mu, 1\}) & \text{if } -2C_\gamma \leq \lambda_\mu \leq \psi_\mu. \end{cases}$$

Hence the theorem is established.

**Proof of Theorem 6.1: a)** Let  $F_\mu$  denote the  $WN(\mu, \rho)$  distribution and  $\delta_x$  denote the point mass at  $x$ . Let  $G_\varepsilon$  be as in the proof of theorem 2.1. We note that,  $E_{(1-\varepsilon)F_0 + \varepsilon\delta_x}(\cos \Theta) = y$  and  $E_{(1-\varepsilon)F_0 + \varepsilon\delta_x}(\sin \Theta) = \varepsilon \sin x$ . Using these we get

$$W(G_\varepsilon) = \sqrt{y^2 + \varepsilon^2 \sin^2 x} - y.$$

Again, an easy computation yields  $W(F_\mu) = c$ . The rest of the proof is similar to theorem 2.1.

**b)** Let  $F_\mu$  and  $\delta_x$  be as in the proof of theorem 6.1. Let  $G_\varepsilon$  be as in the proof of theorem 2.2. It is easy to check from the definition of  $W(F)$  that

$$W(G_\varepsilon) = \sqrt{\rho^2(1-\varepsilon)^2 + 2\rho\varepsilon(1-\varepsilon)\cos(x-\mu) + \varepsilon^2} - (\rho(1-\varepsilon)\cos\mu + \varepsilon\cos x)$$

and  $W(F_0) = 0$ . The rest of the proof is similar to theorem 2.2.

**Proof of Theorem 6.2: a)** Let  $F_\mu$  and  $\delta_x$  be as in the proof of theorem 6.1. Let  $G_\varepsilon$  be as in the proof of theorem 2.1. It is straightforward to check that
