# Supplementary material
Source: publisher figshare collection journal article supplement (https://tandf.figshare.com/articles/dataset/_/1138532)
Supplement: Supplementary file 2 [file 3]

Archive with 2 entries (2 files):
- gsta_a_940351_sm7130.pdf
- gsta_a_940351_sm7129.pdf
