# Supplementary material
Source: publisher figshare collection journal article supplement (https://tandf.figshare.com/articles/dataset/_/1138532)
Supplement: Supplementary file 2 [file 3 › gsta_a_940351_sm7130.pdf]

$W_1(G_\varepsilon) = \arctan^* \left( \frac{\varepsilon \sin x}{\rho(1-\varepsilon) + \varepsilon \cos x} \right)$  and  $W_1(F_\mu) = \mu$ . The rest of the proof is similar to Theorem 3.1.

**b)** Let  $F_\mu$  and  $\delta_x$  be as in the proof of theorem 6.1. Let  $G_\varepsilon$  be as in the proof of theorem 2.2. We note the following  $W_1(G_\varepsilon) = \arctan^* \left( \frac{\rho(1-\varepsilon) \sin \mu + \varepsilon \sin x}{\rho(1-\varepsilon) \cos \mu + \varepsilon \cos x} \right)$  and  $W_1(F_0) = 0$ . The rest of the proof is similar to theorem 3.2.

**Proof of Theorem 6.3 parts a), b), c) and d):** Let  $F_\mu$  and  $\delta_x$  be as in the proof of theorem 6.1. Let  $G_\varepsilon = (1-\varepsilon)F_0 + \varepsilon\delta_x$ ,  $x \in [-\pi, \pi)$  and  $0 \leq \gamma < 0.5$ . Following the similar steps in theorem 4.1, we get  $W_\gamma(G_\varepsilon) = \arctan^* \left[ \frac{\vartheta_{\gamma,0}(1-\varepsilon) \tan \mu_{\gamma,0} + \varepsilon \sin x}{\vartheta_{\gamma,0}(1-\varepsilon) + \varepsilon \cos x} \right]$ ,  $\theta_1 < x < \theta_2$

and  $W_\gamma(F_\mu) = \mu$ . Now using Lemma 2, the rest of the proof follows. To prove part d) let  $G_\varepsilon = (1-\varepsilon)F_\mu + \varepsilon\delta_x$ ,  $x \in [\mu - \pi, \mu + \pi)$  and  $0 \leq \gamma < 0.5$ . Following the similar steps in theorem 4.2 for  $c_1(\mu) < x < c_2(\mu)$ , we get  $W_\gamma(G_\varepsilon) = (1-\varepsilon)\lambda_\mu + \varepsilon \sin x$  and  $W_\gamma(F_0) = 0$ . Using Lemma 4, the rest of the proof follows.

**Proof of Theorem 7.1 a):** Let  $G_\varepsilon = (1-\varepsilon)F_0 + \varepsilon\delta_x$  where  $F_0 \sim M(\tilde{\mu}_0, \kappa)$  and  $x$  is a point on the unit sphere. Then,  $G_\varepsilon$  can be written as

$$W^*(G_\varepsilon) = \left\| (1-\varepsilon)E_{F_0}(\tilde{\mathbf{X}}) + \varepsilon\tilde{\mathbf{X}} \right\| - \tilde{\mu}_0^T \left( (1-\varepsilon)E_{F_0}(\tilde{\mathbf{X}}) + \varepsilon\tilde{\mathbf{X}} \right). \quad \dots (7.1)$$

But since  $E_{F_0}(\sin \Theta \cos \Phi) = E_{F_0}(\sin \Theta \sin \Phi) = 0$  and  $E_{F_0}(\cos \Theta) = \rho$  we have from (7.1)

$$W^*(G_\varepsilon) = \sqrt{\rho^2(1-\varepsilon^2) + 2\rho\varepsilon(1-\varepsilon)\cos \theta + \varepsilon^2} - (\rho(1-\varepsilon) + \varepsilon \cos \theta). \quad \dots (7.2)$$

Now using the fact that  $E_{F_\mu}(\sin\Theta\cos\Phi)=\rho\sin\alpha\cos\beta$ ,  $E_{F_\mu}(\sin\Theta\sin\Phi)=\rho\sin\alpha\sin\beta$ , and  $E_{F_\mu}(\cos\Theta)=\rho\cos\alpha$  we have

$$W^*(F_\mu)=\|E_{F_\mu}(\tilde{\mathbf{X}})\|-\tilde{\boldsymbol{\mu}}_0^T E_{F_\mu}(\tilde{\mathbf{X}})=2\rho\sin^2\left(\frac{\alpha}{2}\right). \quad \dots (7.3)$$

Let  $y=\rho(1-\varepsilon)+\varepsilon\cos\theta$  and  $c=2\rho\sin^2\left(\frac{\alpha}{2}\right)$ . Then using (7.2) and (7.3) we get

$$\varepsilon_\mu^{**}(W^*)=\inf\left\{\varepsilon>0:\sqrt{y^2+\varepsilon^2\sin^2\theta}=y+c \text{ for some } \theta\in[0,\pi]\right\}. \quad \dots (7.4)$$

Hence the theorem is established.

**Proof of Theorem 7.1 b):** Let  $G_\varepsilon=(1-\varepsilon)F_\mu+\varepsilon\delta_x$  where  $F_\mu\sim M(\tilde{\boldsymbol{\mu}}_0, \kappa)$  and  $x$  is a point on the unit sphere. Then,  $G_\varepsilon$  can be written as

$$W^*(G_\varepsilon)=\|(1-\varepsilon)E_{F_\mu}(\tilde{\mathbf{X}})+\varepsilon\tilde{\mathbf{X}}\|-\tilde{\boldsymbol{\mu}}_0^T((1-\varepsilon)E_{F_\mu}(\tilde{\mathbf{X}})+\varepsilon\tilde{\mathbf{X}}). \quad \dots (7.5)$$

But  $\tilde{\boldsymbol{\mu}}_0^T((1-\varepsilon)E_{F_\mu}(\tilde{\mathbf{X}})+\varepsilon\tilde{\mathbf{X}})=\rho(1-\varepsilon)\cos\alpha+\varepsilon\cos\theta$  and

$$\|(1-\varepsilon)E_{F_\mu}(\tilde{\mathbf{X}})+\varepsilon\tilde{\mathbf{X}}\|=\sqrt{\rho^2(1-\varepsilon)^2+2\rho\varepsilon(1-\varepsilon)[\sin\alpha\sin\theta\cos(\phi-\beta)+\cos\alpha\cos\theta]+\varepsilon^2}.$$

$$\text{We also have } W^*(F_0)=\|E_{F_0}(\tilde{\mathbf{X}})\|-\tilde{\boldsymbol{\mu}}_0^T E_{F_0}(\tilde{\mathbf{X}})=0. \quad \dots (7.6)$$

Using (7.5) and (7.6) we get,

$$\varepsilon_\mu^*(W^*)=\inf\left\{\begin{array}{l} \varepsilon>0:\varepsilon^2(\rho^2\sin^2\alpha-2\rho\sin\alpha\sin\theta\cos(\varphi-\beta)+\sin^2\theta) \\ \quad -2\rho\sin\alpha(\sin\theta\cos(\varphi-\beta)-\rho\sin\alpha)\varepsilon+\rho^2\sin^2\alpha=0 \text{ for} \\ \text{some } \theta\in[0,\pi] \text{ and } \varphi\in[0,2\pi) \end{array}\right\}.$$

Let  $u=\sin\theta$ ,  $v=\cos(\varphi-\beta)$  and  $c=\rho\sin\alpha$ . Then the above PBF reduces to

$$\varepsilon_{\mu}^*(W^*) = \inf \left\{ \varepsilon > 0 : \begin{aligned} & (c^2 - 2cuv + u^2)\varepsilon^2 - 2c(uv - c)\varepsilon + c^2 = 0 \\ & \text{for some } \theta \in [0, \pi] \text{ and } \varphi \in [0, 2\pi) \end{aligned} \right\}.$$

The equation  $(c^2 - 2cuv + u^2)\varepsilon^2 - 2c(uv - c)\varepsilon + c^2 = 0$  has roots  $\varepsilon_1 = \frac{c(t_1 - t_2)}{2t_3}$  and  $\varepsilon_2 = \frac{c(t_1 + t_2)}{2t_3}$ , where  $t_1 = (uv - c)$ ,  $t_2 = (|u|\sqrt{1 - v^2})$  and  $t_3 = c^2 - 2cuv + u^2$ .

Hence the theorem is established.

**Theorem 7.2:** Let  $G_{\varepsilon} = (1 - \varepsilon)F_0 + \varepsilon\delta_x$  where  $F_0 \sim M(\tilde{\mu}_0, \kappa)$  and  $x$  is a point on the unit sphere. Then, we can write

$$W_1^*(G_{\varepsilon}) = \begin{bmatrix} \varepsilon \sin \theta \cos \varphi \\ \varepsilon \sin \theta \sin \varphi \\ (1 - \varepsilon)\rho + \varepsilon \cos \theta \end{bmatrix} \text{ and } W_1^*(F_{\mu}) = E_{F_{\mu}}(\tilde{\mathbf{X}}) = \begin{bmatrix} \rho \sin \alpha \cos \beta \\ \rho \sin \alpha \sin \beta \\ \rho \cos \alpha \end{bmatrix}.$$

Now, equating  $W_1^*(G_{\varepsilon}) = W_1^*(F_{\mu})$  we get the following set of equations

$$\varepsilon \sin \theta \cos \varphi - \rho \sin \alpha \cos \beta = 0 \quad \dots (7.7)$$

$$\varepsilon \sin \theta \sin \varphi - \rho \sin \alpha \sin \beta = 0 \quad \dots (7.8)$$

$$(1 - \varepsilon)\rho + \varepsilon \cos \theta - \rho \cos \alpha = 0. \quad \dots (7.9)$$

Dividing equation (7.7) by equation (7.8) we get  $\varphi = \beta$  or  $\beta + \pi$ . Solving equations (7.7) and (7.9) and using the fact that  $\varphi = \beta$ , we get

$$\sin \theta = \frac{\rho \sin \alpha}{\varepsilon} \text{ and } \cos \theta = \frac{\rho \cos \alpha - (1 - \varepsilon)\rho}{\varepsilon}.$$

Using the identity  $\sin^2 \theta + \cos^2 \theta = 1$  and putting  $(1 - \varepsilon) = t$  and simplifying we get

$$(1 - \rho^2)t^2 - 2(1 - \rho^2 \cos \alpha)t + (1 - \rho^2) = 0. \quad \dots (7.10)$$

By putting  $c_1 = (1 - \rho^2 \cos \alpha)$  and  $d_1 = (1 - \rho^2)$ , the solution to (7.10) is given by

$$t = \frac{c_1^2 \pm \sqrt{c_1^2 - d_1^2}}{d_1}. \text{ Thus, } \varepsilon_\mu^{**}(W_1^*) = \min(\varepsilon_1, \varepsilon_2) \text{ where } \varepsilon_1 = \frac{(d_1 - c_1) + \sqrt{c_1^2 - d_1^2}}{d_1} \text{ and}$$

$$\varepsilon_1 = \frac{(d_1 + c_1) + \sqrt{c_1^2 - d_1^2}}{d_1}.$$

In the case of PBF, let  $G_\varepsilon = (1 - \varepsilon)F_\mu + \varepsilon\delta_x$  where  $F_\mu \sim M(\tilde{\mu}_0, \kappa)$  and  $x$  is a point on the unit sphere. Then, we can write

$$W_1^*(G_\varepsilon) = \begin{bmatrix} \rho(1 - \varepsilon)\sin\alpha\cos\beta + \varepsilon\sin\theta\cos\varphi \\ \rho(1 - \varepsilon)\sin\alpha\sin\beta + \varepsilon\sin\theta\sin\varphi \\ \rho(1 - \varepsilon)\cos\alpha + \varepsilon\cos\theta \end{bmatrix} \text{ and } W_1^*(F_0) = E_{F_0}(\tilde{\mathbf{x}}) = \begin{bmatrix} 0 \\ 0 \\ \rho \end{bmatrix}.$$

Now, equating  $W_1^*(G_\varepsilon) = W_1^*(F_0)$  we get the following set of equations.

$$\rho(1 - \varepsilon)\sin\alpha\cos\beta + \varepsilon\sin\theta\cos\varphi = 0 \quad \dots (7.11)$$

$$\rho(1 - \varepsilon)\sin\alpha\sin\beta + \varepsilon\sin\theta\sin\varphi = 0 \quad \dots (7.12)$$

$$\rho(1 - \varepsilon)\cos\alpha + \varepsilon\cos\theta = 0 \quad \dots (7.13)$$

Dividing equation (7.11) by equation (7.12) we get  $\varphi = \beta$  or  $\beta + \pi$ . Solving equations (7.11) and (7.13) and using the fact that  $\varphi = \beta$ , we get

$$\sin\theta = \frac{-\rho(1 - \varepsilon)\sin\alpha}{\varepsilon} \text{ and } \cos\theta = \frac{\rho - \rho(1 - \varepsilon)\cos\alpha}{\varepsilon}.$$

Arguing in the similar fashion as in the case of LBF, we get the same equation (7.10). Now, when  $\varphi = \beta + \pi$  then we have  $\cos\varphi = -\cos\beta$  which also yields the same equation (7.10).

Hence the theorem is established.

**Proof of Lemma 1:** By definition we have for  $0 \leq \gamma < 0.5$ ,  $\mu_{\gamma, \mu} = \arctan^* \left[ \frac{E_{\gamma, F\mu}(\sin \Theta)}{E_{\gamma, F\mu}(\cos \Theta)} \right]$

and  $\mu = \arctan^* \left[ \frac{E_{F\mu}(\sin \Theta)}{E_{F\mu}(\cos \Theta)} \right]$ . Then equating  $\mu_{\gamma, \mu} = \mu$  we get

$$E_{\gamma, F\mu}(\sin \Theta)E_{F\mu}(\cos \Theta) = E_{\gamma, F\mu}(\cos \Theta)E_{F\mu}(\sin \Theta).$$

Define  $T_1$  to be circular arc having  $\mu$  as the centre point which satisfies  $\int_{T_1} f_{\mu}(\theta) d\theta = 1 - 2\gamma$

and let  $T_2 = T_1'$ . Then, by letting  $K = (2\pi I_0(\kappa))^{-1}$  and  $C_1 = K \int_{T_2} \cos \theta f_{\mu}(\theta) d\theta$  we have

$$\begin{aligned} E_{F\mu}(\cos \Theta) &= \int_{-\pi}^{\pi} \cos \theta f_{\mu}(\theta) d\theta = \left[ \int_{T_1} \cos \theta f_{\mu}(\theta) d\theta + \int_{T_2} \cos \theta f_{\mu}(\theta) d\theta \right] \\ &= (1 - 2\gamma)E_{\gamma, F\mu}(\cos \Theta) + K \int_{T_2} \cos \theta f_{\mu}(\theta) d\theta \\ &= (1 - 2\gamma)E_{\gamma, F\mu}(\cos \Theta) + C_1. \end{aligned}$$

Similar calculations shows that  $E_{F\mu}(\sin \Theta) = (1 - 2\gamma)E_{\gamma, F\mu}(\sin \Theta) + S_1$  where

$S_1 = K \int_{T_2} \sin \theta f_{\mu}(\theta) d\theta$ . Writing  $T_2 = (\mu + \pi - \alpha_1, \mu + \pi + \alpha_1)$  and using the fact that

$$\int_{-\alpha_1}^{\alpha_1} \sin v e^{K \cos v} dv = 0 \text{ we get } \frac{S_1}{C_1} = \frac{\int_{\mu + \pi - \alpha_1}^{\mu + \pi + \alpha_1} (\sin(\theta - \mu) \cos \mu + \cos(\theta - \mu) \sin \mu) e^{K \cos(\theta - \mu)} d\theta}{\int_{\mu + \pi - \alpha_1}^{\mu + \pi + \alpha_1} (\cos(\theta - \mu) \cos \mu - \sin(\theta - \mu) \sin \mu) e^{K \cos(\theta - \mu)} d\theta}.$$

After some simplification, it can be shown that  $\frac{S_1}{C_1} = \tan \mu$ .

Hence the lemma is established.

**Proof of Lemma 2:** Suppose  $\theta_1 = F_0^{-1}\left(\frac{\gamma}{1-\varepsilon}\right)$  and  $\theta_2 = F_0^{-1}\left(1 - \frac{\gamma}{1-\varepsilon}\right)$ . Note that since

$F_0$  is symmetric about zero we have  $\theta_1 = -\theta_2$ . Let  $\varepsilon < \min(\gamma, 1-\gamma)$ ,  $\lambda = F_0^{-1}\left(\frac{\gamma-\varepsilon}{1-\varepsilon}\right)$  and

$\psi = F_0^{-1}\left(\frac{1-\gamma}{1-\varepsilon}\right)$ . When  $x \leq \theta_1$ ,  $E_{\gamma, (1-\varepsilon)F_0 + \varepsilon\delta_x}(\sin \Theta) = (1-\varepsilon)\tilde{E}_{\gamma, F_0}(\sin \Theta) = \frac{1-\varepsilon}{1-2\gamma} \int_{\lambda}^{\theta_2} \sin \theta dF_0$  and

$E_{\gamma, (1-\varepsilon)F_0 + \varepsilon\delta_x}(\cos \Theta) = (1-\varepsilon)\tilde{E}_{\gamma, F_0}(\cos \Theta) = \frac{1-\varepsilon}{1-2\gamma} \int_{\lambda}^{\theta_2} \cos \theta dF_0$ . Therefore, by using Lemma 1,

we get  $W_{\gamma}(G_{\varepsilon}) = \arctan^* \left[ \frac{\tilde{E}_{\gamma, F_0}(\sin \Theta)}{\tilde{E}_{\gamma, F_0}(\cos \Theta)} \right]$  and  $W_{\gamma}(F_{\mu}) = \arctan^* \left[ \frac{E_{\gamma, F_{\mu}}(\sin \Theta)}{E_{\gamma, F_{\mu}}(\cos \Theta)} \right] = \mu$ . But,

$$\begin{aligned} \tilde{E}_{\gamma, F_0}(\sin \Theta) &= (1-2\gamma)^{-1} \int_{\lambda}^{\theta_2} \sin \theta dF_0 = (1-2\gamma)^{-1} \left( \int_{\lambda}^{-\theta_2} \sin \theta dF_0 + \int_{-\theta_2}^{\theta_2} \sin \theta dF_0 \right) \\ &= (1-2\gamma)^{-1} \int_{\lambda}^{-\theta_2} \sin \theta dF_0 \end{aligned} \quad \text{and}$$

$$\begin{aligned} \tilde{E}_{\gamma, F_0}(\cos \Theta) &= (1-2\gamma)^{-1} \int_{\lambda}^{\theta_2} \cos \theta dF_0 = (1-2\gamma)^{-1} \left[ \int_{-\theta_2}^{\theta_2} \cos \theta dF_0 + \int_{\lambda}^{-\theta_2} \cos \theta dF_0 \right] \\ &= (1-2\gamma)^{-1} \left[ 2 \int_0^{\theta_2} \cos \theta dF_0 + \int_{\lambda}^{-\theta_2} \cos \theta dF_0 \right] \\ &= (1-2\gamma)^{-1} \left[ A(\kappa) - 2 \int_{\theta_2}^{\pi} \cos \theta dF_0 + \int_{\lambda}^{-\theta_2} \cos \theta dF_0 \right] \\ &= (1-2\gamma)^{-1} \left[ A(\kappa) - \int_{\theta_2}^{\pi} \cos \theta dF_0 + \int_{-\pi}^{\lambda} \cos \theta dF_0 \right]. \end{aligned}$$

Therefore,  $\frac{\tilde{E}_{\gamma, F_0}(\sin \Theta)}{\tilde{E}_{\gamma, F_0}(\cos \Theta)} = \frac{\int_{\lambda}^{-\theta_2} \sin \theta dF_0}{A(\kappa) - \int_{\theta_2}^{\pi} \cos \theta dF_0 + \int_{-\pi}^{\lambda} \cos \theta dF_0} \neq 0$ , since  $\int_{\lambda}^{-\theta_2} \sin \theta dF_0 \neq 0$ .

Similar computations shows that  $W_\gamma(G_\varepsilon) \neq \mu$  when  $x \geq \theta_2$ .

Hence the lemma is established.

**Proof of Lemma 3:** Suppose  $\theta^* < \pi/2$ . Then  $\cos \theta > 0 \quad \forall 0 \leq \theta \leq \theta^* \Rightarrow C_\gamma > 0$ . When  $\theta^* > \pi/2$ , let  $\theta^* = \pi/2 + \delta$  and  $\beta^* = \pi/2 - \delta$ . Then  $\cos \beta = -\cos \alpha$  and hence

$e^{k \cos \alpha} > e^{k \cos \beta}$ . Thus,  $\int_{\beta^*}^{\pi/2} \cos \alpha e^{k \cos \alpha} d\alpha > \left| \int_{\pi/2}^{\theta^*} \cos \beta e^{k \cos \beta} d\beta \right|$ . Therefore, we get

$$\int_0^{\theta^*} \cos \alpha e^{k \cos \alpha} d\alpha = \int_0^{\beta^*} \cos \alpha e^{k \cos \alpha} d\alpha + \int_{\beta^*}^{\pi/2} \cos \alpha e^{k \cos \alpha} d\alpha + \int_{\pi/2}^{\theta^*} \cos \alpha e^{k \cos \alpha} d\alpha > 0.$$

**Proof of Lemma 4:** Suppose  $\theta^* < \pi/2$ . Then  $\cos \theta > 0 \quad \forall 0 \leq \theta \leq \theta^* \Rightarrow C_\gamma > 0$ . When  $\theta^* > \pi/2$ , let  $\theta^* = \pi/2 + \delta$  and  $\beta^* = \pi/2 - \delta$ . Since  $f_0(\alpha) > f_0(\beta)$  (see Stadje, 1984 with

$\alpha = 2\pi, j = 1$  and  $\theta = 0$ ) we have,  $\int_{\beta^*}^{\pi/2} \cos \alpha f_0(\alpha) d\alpha > \left| \int_{\pi/2}^{\theta^*} \cos \beta f_0(\beta) d\beta \right|$ . Therefore, we get

$$\int_0^{\theta^*} \cos \alpha f_0(\alpha) d\alpha = \int_0^{\beta^*} \cos \alpha f_0(\alpha) d\alpha + \int_{\beta^*}^{\pi/2} \cos \alpha f_0(\alpha) d\alpha + \int_{\pi/2}^{\theta^*} \cos \alpha f_0(\alpha) d\alpha > 0.$$

Hence the lemma is established.

## Reference

Stadje, W. (1984), *Wrapped Distributions and Measurement Errors*, *Metrika*, vol. 31, 303-317.

## Tables and Graphs

**Table A PBP for different values of  $\kappa$**

| Test Functional | $\kappa = 1$ | $\kappa = 2$ | $\kappa = 4$ | $\kappa = 10$ |
|-----------------|--------------|--------------|--------------|---------------|
| W               | 0.31         | 0.41         | 0.46         | 0.49          |
| $W_1$           | 0.31         | 0.41         | 0.46         | 0.49          |

**Table B: Size of CM and  $\gamma$ -CTM tests when observations come from  $(1-\varepsilon)CN(0, \kappa) + \varepsilon\delta_x$  for different values of  $\varepsilon$ .**  
( $n = 100$ ,  $\kappa = 1$  and  $\gamma = 0.05$ )

| $x$       | CM<br>( $\varepsilon = 0.01$ ) | $\gamma$ -CTM<br>( $\varepsilon = 0.01$ ) | CM<br>( $\varepsilon = 0.05$ ) | $\gamma$ -CTM<br>( $\varepsilon = 0.05$ ) | CM<br>( $\varepsilon = 0.1$ ) | $\gamma$ -CTM<br>( $\varepsilon = 0.1$ ) |
|-----------|--------------------------------|-------------------------------------------|--------------------------------|-------------------------------------------|-------------------------------|------------------------------------------|
| $-\pi/4$  | 0.05                           | 0.05                                      | 0.07                           | 0.08                                      | 0.15                          | 0.17                                     |
| $-\pi/6$  | 0.05                           | 0.05                                      | 0.05                           | 0.05                                      | 0.07                          | 0.08                                     |
| $-\pi/8$  | 0.05                           | 0.04                                      | 0.04                           | 0.05                                      | 0.05                          | 0.05                                     |
| $-\pi/50$ | 0.04                           | 0.05                                      | 0.03                           | 0.04                                      | 0.02                          | 0.02                                     |
| $\pi/8$   | 0.05                           | 0.05                                      | 0.04                           | 0.05                                      | 0.05                          | 0.07                                     |
| $\pi/6$   | 0.05                           | 0.05                                      | 0.05                           | 0.05                                      | 0.07                          | 0.09                                     |
| $\pi/4$   | 0.05                           | 0.05                                      | 0.07                           | 0.08                                      | 0.15                          | 0.17                                     |

**Table C: Size of CM and  $\gamma$ -CTM tests when observations come from  $(1-\varepsilon)CN(0, \kappa) + \varepsilon\delta_x$  for different values of  $n$ .**  
( $\kappa = 1$ ,  $\varepsilon = 0.01$  and  $\gamma = 0.05$ )

| $x$       | CM<br>( $n = 25$ ) | $\gamma$ -CTM<br>( $n = 25$ ) | CM<br>( $n = 50$ ) | $\gamma$ -CTM<br>( $n = 50$ ) | CM<br>( $n = 100$ ) | $\gamma$ -CTM<br>( $n = 100$ ) |
|-----------|--------------------|-------------------------------|--------------------|-------------------------------|---------------------|--------------------------------|
| $-\pi/4$  | 0.05               | 0.05                          | 0.05               | 0.04                          | 0.05                | 0.05                           |
| $-\pi/6$  | 0.04               | 0.05                          | 0.05               | 0.05                          | 0.05                | 0.05                           |
| $-\pi/8$  | 0.05               | 0.05                          | 0.05               | 0.05                          | 0.05                | 0.04                           |
| $-\pi/50$ | 0.04               | 0.05                          | 0.04               | 0.05                          | 0.04                | 0.05                           |
| $\pi/8$   | 0.05               | 0.05                          | 0.05               | 0.05                          | 0.05                | 0.05                           |
| $\pi/6$   | 0.05               | 0.05                          | 0.05               | 0.05                          | 0.05                | 0.05                           |
| $\pi/4$   | 0.04               | 0.05                          | 0.05               | 0.05                          | 0.05                | 0.05                           |

| <b>Table D: Power values of CM and <math>\gamma</math>-CTM when observations come from <math>(1-\varepsilon)CN(0,\kappa)+\varepsilon\delta_x</math> for different values of n.</b><br><b>(<math>\kappa=1, \varepsilon=0.01, \mu_a=-\pi/2</math> and <math>\gamma=0.05</math>)</b> |                |                           |                |                           |                 |                            |
|-----------------------------------------------------------------------------------------------------------------------------------------------------------------------------------------------------------------------------------------------------------------------------------|----------------|---------------------------|----------------|---------------------------|-----------------|----------------------------|
| $\mu_a$                                                                                                                                                                                                                                                                           | CM<br>(n = 25) | $\gamma$ -CTM<br>(n = 25) | CM<br>(n = 50) | $\gamma$ -CTM<br>(n = 50) | CM<br>(n = 100) | $\gamma$ -CTM<br>(n = 100) |
| $\pi/4$                                                                                                                                                                                                                                                                           | 0.68           | 0.69                      | 0.93           | 0.93                      | 0.99            | 0.99                       |
| $\pi/8$                                                                                                                                                                                                                                                                           | 0.22           | 0.23                      | 0.40           | 0.42                      | 0.68            | 0.70                       |
| $\pi/12$                                                                                                                                                                                                                                                                          | 0.13           | 0.13                      | 0.21           | 0.23                      | 0.36            | 0.40                       |
| $\pi/25$                                                                                                                                                                                                                                                                          | 0.06           | 0.06                      | 0.06           | 0.10                      | 0.11            | 0.14                       |
| $\pi/50$                                                                                                                                                                                                                                                                          | 0.06           | 0.06                      | 0.06           | 0.06                      | 0.06            | 0.06                       |
| $\pi/100$                                                                                                                                                                                                                                                                         | 0.06           | 0.06                      | 0.06           | 0.06                      | 0.06            | 0.06                       |

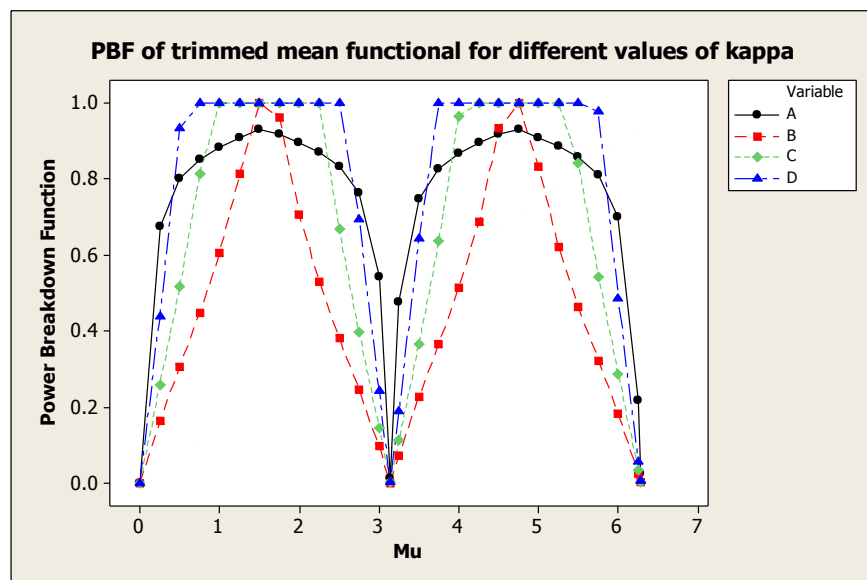

**Figure A [Legends: A-  $W_\gamma$  ( $\kappa=1$ ), B-  $W_\gamma$  ( $\kappa=2$ ), C-  $W_\gamma$  ( $\kappa=4$ ), D-  $W_\gamma$  ( $\kappa=10$ )].**
